# Supplementary material for: A ligand-specific bimetallic electrocatalyst for efficient oxygen evolution reaction at higher current density
Source: Royal Society of Chemistry journal article supplement (doi:10.1039/d4se01656d), 2025-01-01
Supplement: d4se01656d1.pdf [file d4se01656d1.pdf]

## **Ligand-specific bimetallic electrocatalyst for efficient oxygen evolution reaction at higher current density**

*Varsha K<sup>a</sup>, Kiran G. K<sup>b</sup>, Sutar Rani Ananda<sup>a</sup>, Lokesh Koodlur Sannegowda<sup>c\*</sup>, Shambhulinga  
Aralekallu<sup>a\*</sup>*

*<sup>a</sup>Centre for Research in Functional Materials (CRFM), JAIN (Deemed-to-be University),  
Jain Global Campus, Bengaluru 562112, Karnataka, India*

*<sup>b</sup> Department of Chemical Engineering, Quantum Nano Centre, University of Waterloo, N2L  
3G1 Ontario, Canada*

*<sup>c</sup> Department of Studies in Chemistry, Vijayanagara Sri Krishnadevaraya University,  
Vinayakanagara, Ballari-583105, India*

**\*Corresponding authors:** [shambulinga.a@jainuniversity.ac.in](mailto:shambulinga.a@jainuniversity.ac.in); [kslokesh@vskub.ac.in](mailto:kslokesh@vskub.ac.in)

**Materials:**

Nickel nitrate hexahydrate ( $\text{Ni}(\text{NO}_3)_2 \cdot 6\text{H}_2\text{O}$ ) purchased from Nice Chemicals (P) Ltd, cobalt (II) nitrate hexahydrate 98% purchased from AVRA and trimesic acid 95% from Sigma-Aldrich used as organic ligand for MOF synthesis, Nafion 5%, ethanol and DMF were purchased from local vendors and used without any further purification.

**Material characterization**

The X-ray diffraction (XRD) instrument with Cu  $K\alpha$  radiation ( $\lambda = 1.54 \text{ \AA}$ ) was used to analyze the crystalline nature of the electrocatalyst. Scanning electron microscopy (SEM, Model EVOL15,) was used to examine the morphology of the electrocatalyst. X-ray photoelectron spectroscopy (XPS) (K-alpha, Thermo Scientific, USA) with Al  $K\alpha$  radiation (1486.6 eV) was used for quantitative assessment of the elemental composition. Nitrogen physisorption experiments was carried out using BELSORP-mini II (Japan) instrument with  $\text{N}_2$  gas to determine the BET surface

**Pre-treatment of Carbon cloth:**

The commercial carbon cloth was cut into a rectangular piece with a size of  $1 \text{ cm} \times 1 \text{ cm}$  and treated with ethanol, acetone, and distilled water separately by ultrasonication for 15 mins and then dried at  $60^\circ\text{C}$  in a hot air oven. The cleaned carbon cloth was used for modification.

**Electrode Preparation:**

The catalyst ink was prepared by dispersing 20 mg of NiCo t-MOF electrocatalyst in a mixed solution of 300  $\mu\text{L}$  of iso-propanol and 20  $\mu\text{L}$  of Nafion. The mixture was sonicated for about 30 min to form homogeneous slurry. Then, the catalyst ink (100  $\mu\text{L}$ ) was coated on a pre-treated carbon cloth (area  $1\text{cm}^2$ ) and dried at  $60^\circ\text{C}$  for 2 h. The constructed working electrodes were used to evaluate the electrochemical activity using CV, LSV and EIS. The electrochemical measurements were carried out with CHI760E electrochemical workstation (CH Instruments) with a three-electrode cell at ambient conditions. The specimen ( $1\text{cm} \times 1\text{cm}$ ), graphite rod and  $\text{Hg}/\text{HgO}$  were used as working, counter and reference electrodes respectively. The electrocatalytic activity was measured in 1M KOH electrolyte. The potential measured versus the  $\text{Hg}/\text{HgO}$  electrode was converted to reversible hydrogen electrode (RHE) according to the following equation.

$$E_{(\text{RHE})} = E_{\text{Hg}/\text{HgO}} + E^0_{\text{Hg}/\text{HgO}} + 0.0592 \cdot \text{pH}$$

## **Faradaic Efficiency (FE) Calculation**

Applied current density (j): 100 mAcm<sup>-2</sup>

Electrode area (A): 1 cm<sup>2</sup>

Time (t): 3600 seconds (1 hour).

Oxygen evolved (Δm): 0.45 g of oxygen is evolved during the reaction

Number of electrons per mole of O<sub>2</sub>(n): 4 (4-electron transfer OER reaction).

Faraday constant (F): 96485 Cmol<sup>-1</sup>

Molar mass of oxygen (M<sub>O2</sub>): 32 g mol<sup>-1</sup>

### **Step-by-Step FE Calculation**

#### **1. Calculate the Total Current (I):**

The total current (I) is the current density (j) multiplied by the electrode area (A):

$$I = j \times A = \left( 100 \times 10^{-3} \frac{A}{cm^2} \right) \times 1 cm^2 = 0.1 A$$

#### **2. Calculate the Moles of O<sub>2</sub> Evolved:**

The amount of oxygen evolved ((Δm = 0.45 g) can be converted to moles of O<sub>2</sub>:

$$\text{Moles of } O_2 = \frac{\Delta m}{M_{O_2}} = \frac{0.45 g}{32 g mol^{-1}} = 1.40625 \times 10^{-2} mol$$

#### **3. Calculate the total charge passed:**

The total charge is given by:

$$\text{Charge} = I \times t = 0.1 A \times 3600 s = 360 C$$

#### **4. Calculate the Faradaic Efficiency:**

Now, calculate the faradaic efficiency for O<sub>2</sub> using the following formula:

$$FE_{O_2} = \frac{4 \times I \times T}{n \times F \times \Delta m} \times 100$$

Substituting the values;

$$FE_{O_2} = \frac{4 \times 0.1 A \times 3600 s}{4 \times 96485 C mol^{-1} \times 1.4065 \times 10^{-2} mol} \times 100$$

Simplifying;

$$FE_{O_2} = \frac{1440}{4 \times 96485 \times 1.40625 \times 10^{-2}} \times 100$$

$$FE_{O_2} = \frac{1440}{542.625} \times 100$$

$$FE_{O_2} = 92.7\%$$

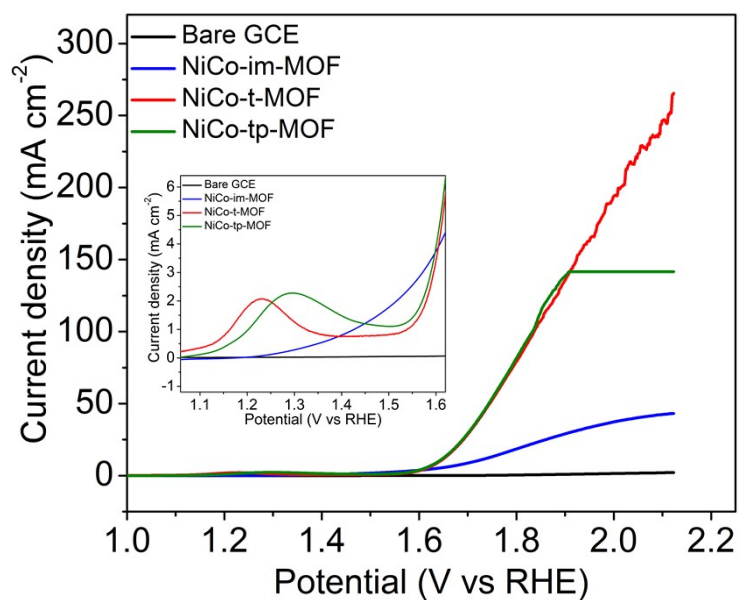

**Fig. S1.** OER studies of Bare GCE, NiCo-im-MOF/GCE, NiCo-t-MOF/GCE and NiCo-tp-MOF/GCE at a scan rate of 5 mV/s in 1 M KOH solution. Inset: the zoomed portion shows the oxidation peaks of  $Ni^{2+}$  to  $Ni^{3+}$  and  $Co^{2+}$  to  $Co^{3+}$  in the potential of 1.2 to 1.4 V vs RHE

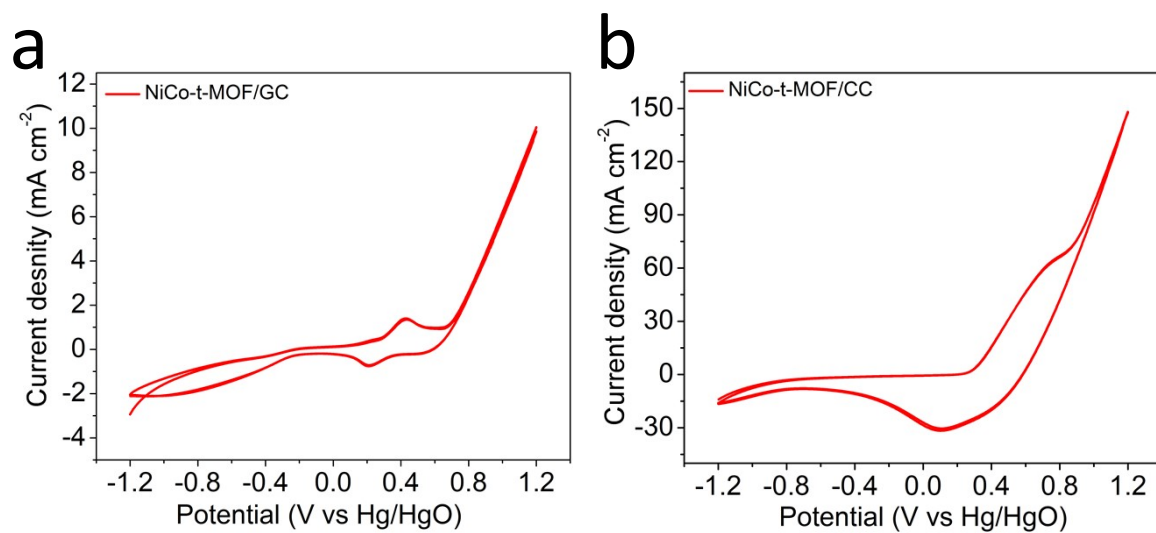

**Fig. S2.** Cyclic voltammogram of NiCo t-MOF on GCE and Carbon cloth (CC) in 1M KOH solution at the scan rate 50 mV/s.

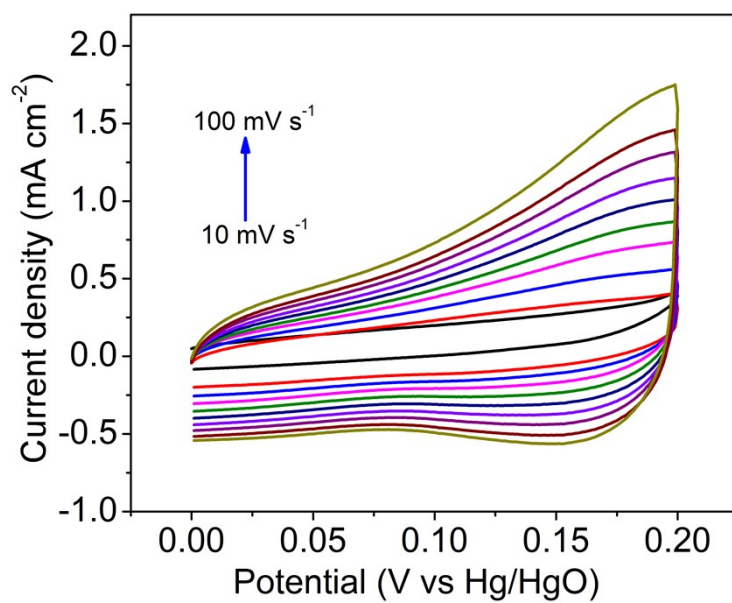

**Fig. S3** CVs at different scan rates for NiCo-t-MOF in 1 M KOH solution

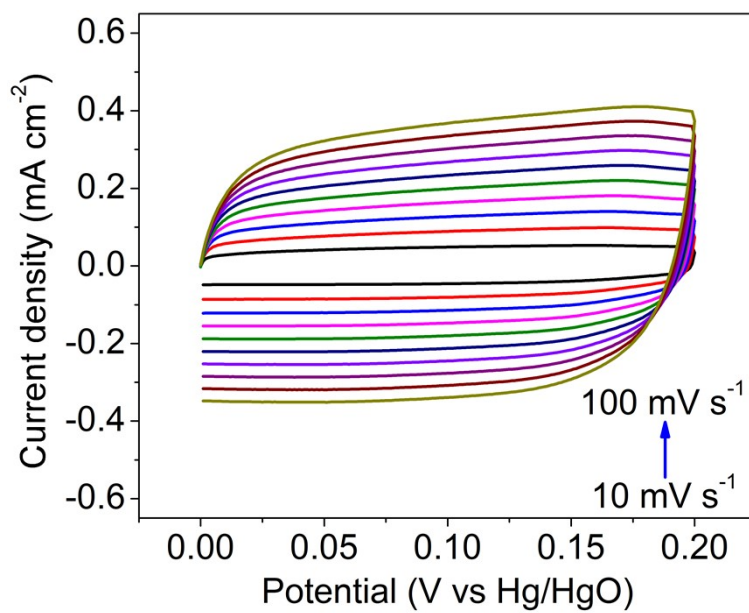

**Fig. S4** CVs at different scan rates for RuO<sub>2</sub> in 1 M KOH solution.

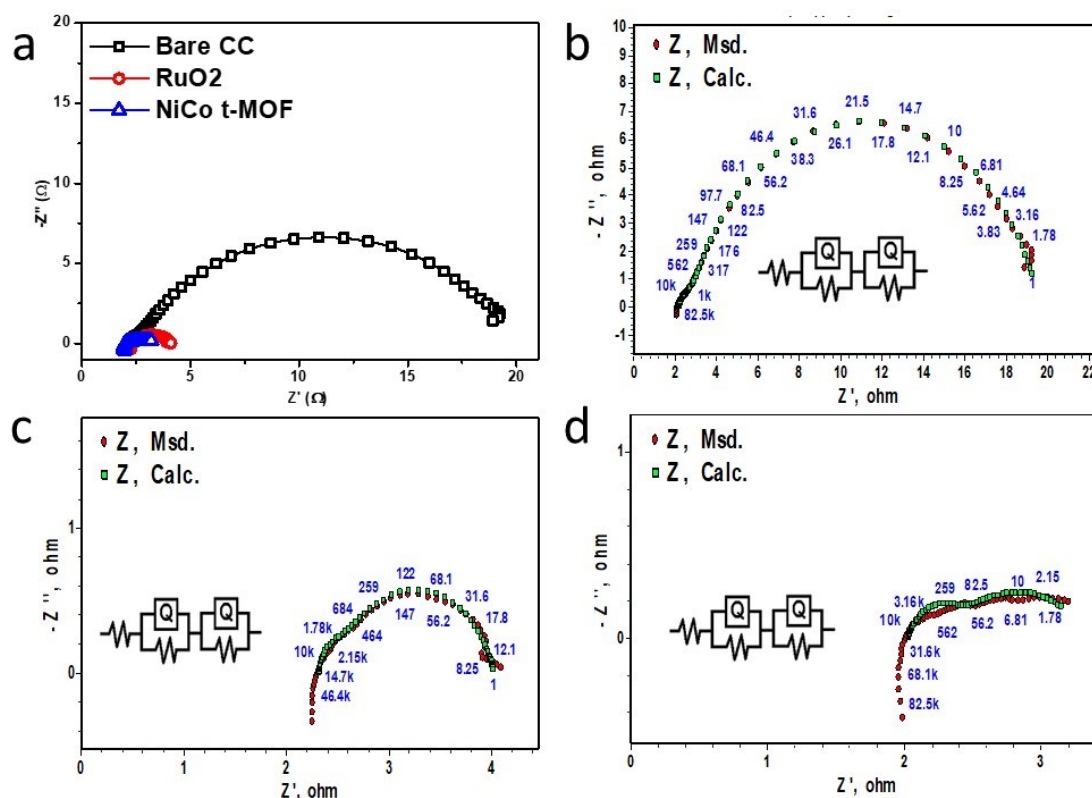

**Fig. S5**(a) Cole-Cole (Nyquist) plot along with fitted curves and an equivalent circuit for (b) Bare CC, (c) RuO<sub>2</sub> and (d) NiCo-t-MOF

**Table S1:** Equivalent circuit parameters

| Compound         | Equivalent circuit | $R_s$ | $Q_g$    | $R_g$  | $Q_{gb}$ | $R_{gb}$ | $R_g + R_{gb}$ |
|------------------|--------------------|-------|----------|--------|----------|----------|----------------|
| Bare CC          | R(QR)(QR)          | 2.133 | 0.952E-3 | 16.8   | 0.387E-3 | 0.6574   | 17.45          |
| RuO <sub>2</sub> | R(QR)(QR)          | 2.313 | 3.317E-3 | 1.481  | 0.396E-3 | 0.2291   | 1.71           |
| NiCo-t-MOF       | R(QR)(QR)          | 2.024 | 11.67    | 0.9849 | 2.704E-3 | 0.3417   | 1.32           |

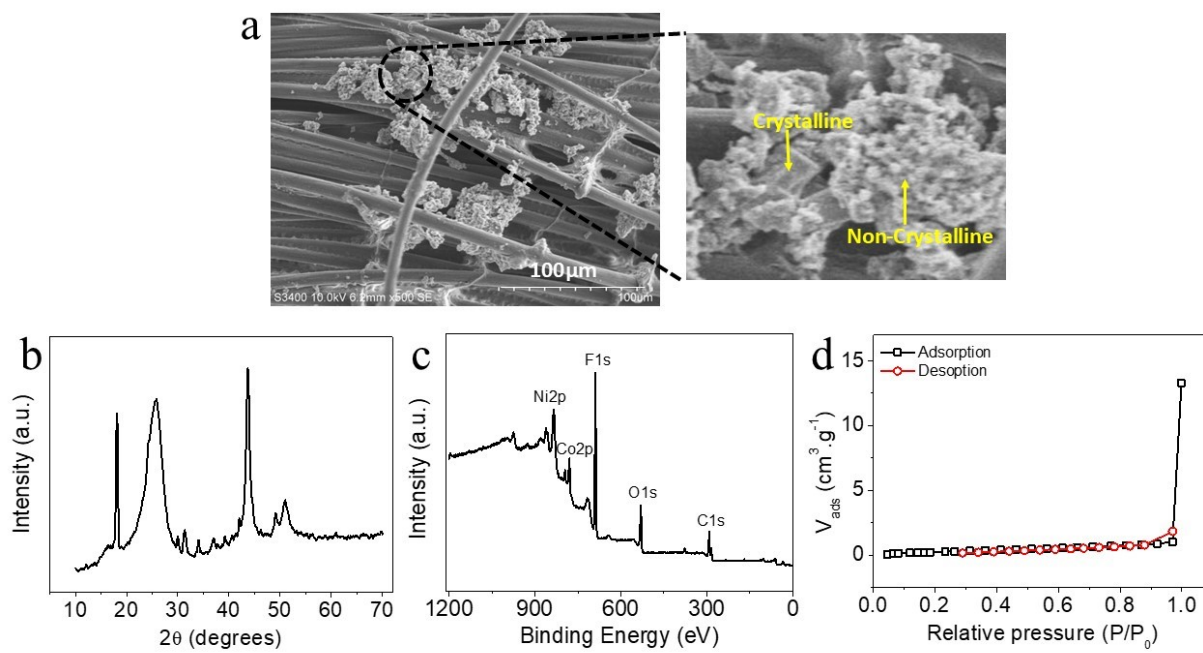

**Fig S6.**(a) SEM images, (b) XRD and (c) N<sub>2</sub> adsorption–desorption isotherms for NiCo-t-MOF after stability tests



### **Proposed possible OER mechanism with reference to NiCo-t-MOF**

**1. Adsorption of hydroxide (OH<sup>-</sup>)**

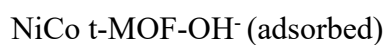

**2. Oxidation of hydroxide (OH<sup>-</sup>) to oxygen species (M-O)**

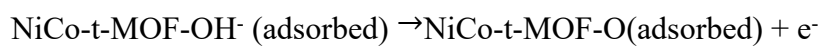

**3. Coupling of oxygen species (M-O) to form O<sub>2</sub>**

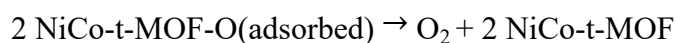

**4. Desorption of O<sub>2</sub> and regeneration of catalyst (desorbed from NiCo-t-MOF)**

**Overall OER reaction in alkaline medium**

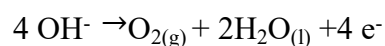

**Table S2.** Comparison of the NiCo-t-MOF/CC with the reported catalyst materials

| Electrocatalyst                                                     | Overpotential<br>( $\eta$ , mV@mA cm <sup>-2</sup> ) | Tafel slope<br>(mV dec <sup>-1</sup> ) | Stability | Ref       |
|---------------------------------------------------------------------|------------------------------------------------------|----------------------------------------|-----------|-----------|
| Mn <sub>x</sub> Fe <sub>3-x</sub> O <sub>4</sub>                    | 510 mV@100                                           | -                                      | 10 h      | 1         |
| Zn <sub>0.3</sub> Co <sub>2.7</sub> (PO <sub>4</sub> ) <sub>2</sub> | 390 mV@50                                            | -                                      | 25 h      | 2         |
| Co <sub>2</sub> B                                                   | 380 mV@10                                            | 45                                     | -         | 3         |
| NiO/NiCo <sub>2</sub> O <sub>4</sub>                                | 336 mV@50                                            | 93.2                                   | 40 h      | 4         |
| NiCo alloy                                                          | 390 mV @ 100                                         | 69.4                                   | 15 h      | 5         |
| CoNiTe <sub>2</sub> /NF                                             | 181 mV@10                                            | 44                                     | 24 h      | 6         |
| Te/Fe-NiOOH                                                         | 220 mV@10                                            | 93                                     | 20 h      | 7         |
| CoTe@NR/NF                                                          | 350 mV@100                                           | 75                                     | 24 h      | 8         |
| Cu(OH) <sub>2</sub> @Co                                             | 355 mV@100                                           | 70.2                                   | 20h       | 9         |
| Ni <sub>3</sub> Te <sub>2</sub> -CoTe                               | 392@100                                              | 68                                     | 24h       | 10        |
| NiSe <sub>2</sub>                                                   | 235 mV@10                                            | 63.1                                   | 80 h      | 11        |
| NixPy-325                                                           | 320 mV@10                                            | 72.2                                   | 60 h      | 12        |
| NiCo-t-MOF/CC                                                       | 440 mV@100                                           | 81                                     | 62 h      | This work |

**Table S3.** OER electrocatalysts in the full-cell configuration water electrolyser where commercial Pt-based catalysts are used as cathodic HER electrocatalyst and designed catalysts used as the anodic OER electrocatalyst in the two-electrode configuration.

| Cell configuration                               | Electrolyte | Cell voltage                    | Stability | Ref       |
|--------------------------------------------------|-------------|---------------------------------|-----------|-----------|
| Pt/C  Ru@NiCo-MOF-4                              | 1 M KOH     | 1.57 V @ 10 mA cm <sup>-2</sup> | -         | [13]      |
| Pt/C  RuO <sub>2</sub>                           | 1 M KOH     | 1.62 V @ 10 mA cm <sup>-2</sup> | -         | [14]      |
| Pt net  NiO/NiCo <sub>2</sub> O <sub>4</sub> /NF | 1 M KOH     | 1.67 V @ 20 mA cm <sup>-2</sup> | 30 h      | [15]      |
| Pt  NiS/CoNC                                     | 1 M KOH     | 1.33 V @ 10 mA cm <sup>-2</sup> | -         | [16]      |
| Pt/C  0.7Sr                                      | 4 M KOH     | 1.62 V @ 10 mA cm <sup>-2</sup> | 200 h     | [17]      |
| Pt/C  NiCo-t-MOF                                 | 1 M KOH     | 1.49 V @ 10 mA cm <sup>-2</sup> | 30 h      | This work |

## References

1. Konno, Y.; Yamamoto, T.; Nagayama, T., Nanoporous manganese ferrite films by anodising electroplated Fe–Mn alloys for bifunctional oxygen electrodes. *Nanoscale* **2021**,13 (29), 12738-12749.
2. Kumar, R.; Inta, H. R.; Koppiseti, H. V. S. R. M.; Ganguli, S.; Ghosh, S.; Mahalingam, V., Electrochemical Reconstruction of Zn<sub>0.3</sub>Co<sub>2.7</sub>(PO<sub>4</sub>)<sub>2</sub>·4H<sub>2</sub>O for Enhanced Water Oxidation Performance. *ACS Applied Energy Materials* **2020**,3 (12), 12088-12098.
3. Masa, J.; Weide, P.; Peeters, D.; Sinev, I.; Xia, W.; Sun, Z.; Somsen, C.; Muhler, M.; Schuhmann, W., Amorphous Cobalt Boride (Co<sub>2</sub>B) as a Highly Efficient Nonprecious Catalyst for Electrochemical Water Splitting: Oxygen and Hydrogen Evolution. *Advanced Energy Materials* **2016**,6 (6), 1502313.
4. Liu, G.; Cheng, Y.; Qiu, M.; Li, C.; Bao, A.; Sun, Z.; Yang, C.; Liu, D., Facilitating interface charge transfer via constructing NiO/NiCo<sub>2</sub>O<sub>4</sub> heterostructure for oxygen evolution reaction under alkaline conditions. *Journal of Colloid and Interface Science* **2023**,643, 214-222.
5. Zhang, B.; Zhang, X.; Wei, Y.; Xia, L.; Pi, C.; Song, H.; Zheng, Y.; Gao, B.; Fu, J.; Chu, P. K., General synthesis of NiCo alloy nanochain arrays with thin oxide coating: a

highly efficient bifunctional electrocatalyst for overall water splitting. *Journal of Alloys and Compounds* **2019**,797, 1216-1223.

6. Qian, G.; Mo, Y.; Yu, C.; Zhang, H.; Yu, T.; Luo, L.; Yin, S., Free-standing bimetallic CoNiTe<sub>2</sub> nanosheets as efficient catalysts with high stability at large current density for oxygen evolution reaction. *Renewable Energy* **2020**,162, 2190-2196.
7. Ibraheem, S.; Li, X.; Shah, S. S. A.; Najam, T.; Yasin, G.; Iqbal, R.; Hussain, S.; Ding, W.; Shahzad, F., Tellurium Triggered Formation of Te/Fe-NiOOH Nanocubes as an Efficient Bifunctional Electrocatalyst for Overall Water Splitting. *ACS Applied Materials & Interfaces* **2021**,13 (9), 10972-10978.
8. Yang, L.; Xu, H.; Liu, H.; Cheng, D.; Cao, D., Active Site Identification and Evaluation Criteria of In Situ Grown CoTe and NiTe Nanoarrays for Hydrogen Evolution and Oxygen Evolution Reactions. *Small Methods* **2019**,3 (5), 1900113.
9. Wang, J.; Guo, Z.; Liu, M.; Wang, Y.; Liu, H.; Wu, L.; Xue, Y.; Cai, N.; Li, H.; Yu, F., CoMoO<sub>4</sub> nanoparticles decorated ultrathin nanoplates constructed porous flower as an electrocatalyst toward overall water splitting and Zn-air batteries. *Renewable Energy* **2023**,212, 751-760.
10. Xu, J.; Yin, Y.; Xiong, H.; Du, X.; Jiang, Y.; Guo, W.; Wang, Z.; Xie, Z.; Qu, D.; Tang, H.; Deng, Q.; Li, J., Improving catalytic activity of metal telluride by hybridization: An efficient Ni<sub>3</sub>Te<sub>2</sub>-CoTe composite electrocatalyst for oxygen evolution reaction. *Applied Surface Science* **2019**,490, 516-521.
11. Zhang, J.; Wang, Y.; Zhang, C.; Gao, H.; Lv, L.; Han, L.; Zhang, Z., Self-Supported Porous NiSe<sub>2</sub> Nanowrinkles as Efficient Bifunctional Electrocatalysts for Overall Water Splitting. *ACS Sustainable Chemistry & Engineering* **2018**,6 (2), 2231-2239.
12. Li, J.; Li, J.; Zhou, X.; Xia, Z.; Gao, W.; Ma, Y.; Qu, Y., Highly Efficient and Robust Nickel Phosphides as Bifunctional Electrocatalysts for Overall Water-Splitting. *ACS Applied Materials & Interfaces* **2016**,8 (17), 10826-10834.
13. Liu, D., et al., *3D Porous Ru-Doped NiCo-MOF Hollow Nanospheres for Boosting Oxygen Evolution Reaction Electrocatalysis*. Inorganic Chemistry, 2021. **60**(8): p. 5882-5889.
14. Qiu, T., et al., *Highly exposed ruthenium-based electrocatalysts from bimetallic metal-organic frameworks for overall water splitting*. Nano Energy, 2019. **58**: p. 1-10.

15. Liu, G., et al., *Facilitating interface charge transfer via constructing NiO/NiCo<sub>2</sub>O<sub>4</sub> heterostructure for oxygen evolution reaction under alkaline conditions*. Journal of Colloid and Interface Science, 2023. **643**: p. 214-222.
16. Shi, M., et al., *MOF nanosheet array-derived NiS with Co, N-doped carbon layer: A highly efficient oxygen evolution electrocatalyst*. Ceramics International, 2023. **49**(5): p. 7613-7622.
17. Wei, R., et al., *Tuning the high-entropy perovskite as efficient and reliable electrocatalysts for oxygen evolution reaction*. RSC Advances, 2024. **14**(26): p. 18117-18125.
